# Supplementary material for: β2-adrenergic receptor signaling regulates metabolic pathways critical to myeloid-derived suppressor cell function within the TME
Source: PubMed Central journal article supplement — Cell Rep. Author manuscript; Available in PMC 2021 Nov 18. (PMC8601406; doi:10.1016/j.celrep.2021.109883), 2021-10-26
Supplement: NIHMS1752051-supplement-1.pdf [file NIHMS1752051-supplement-1.pdf]

**Cell Reports, Volume 37**

**Supplemental information**

**$\beta$ 2-adrenergic receptor signaling regulates metabolic pathways critical to myeloid-derived suppressor cell function within the TME**

**Hemn Mohammadpour, Cameron R. MacDonald, Philip L. McCarthy, Scott I. Abrams, and Elizabeth A. Repasky**

# Supplemental Figure 1

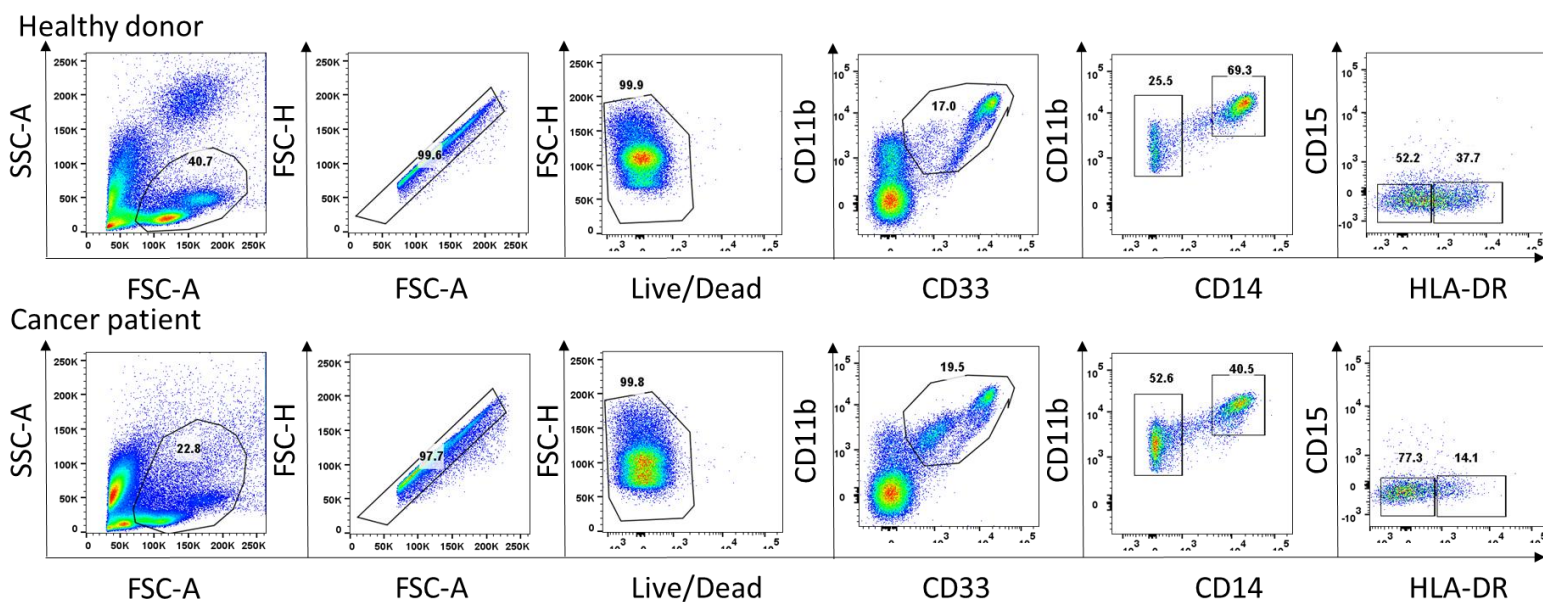

**Supplementary Figure 1:** Gating strategy to identify MDSCs (M-MDSCs) in human samples by flowcytometry. Related to Figure 1.

## Supplemental Figure 2

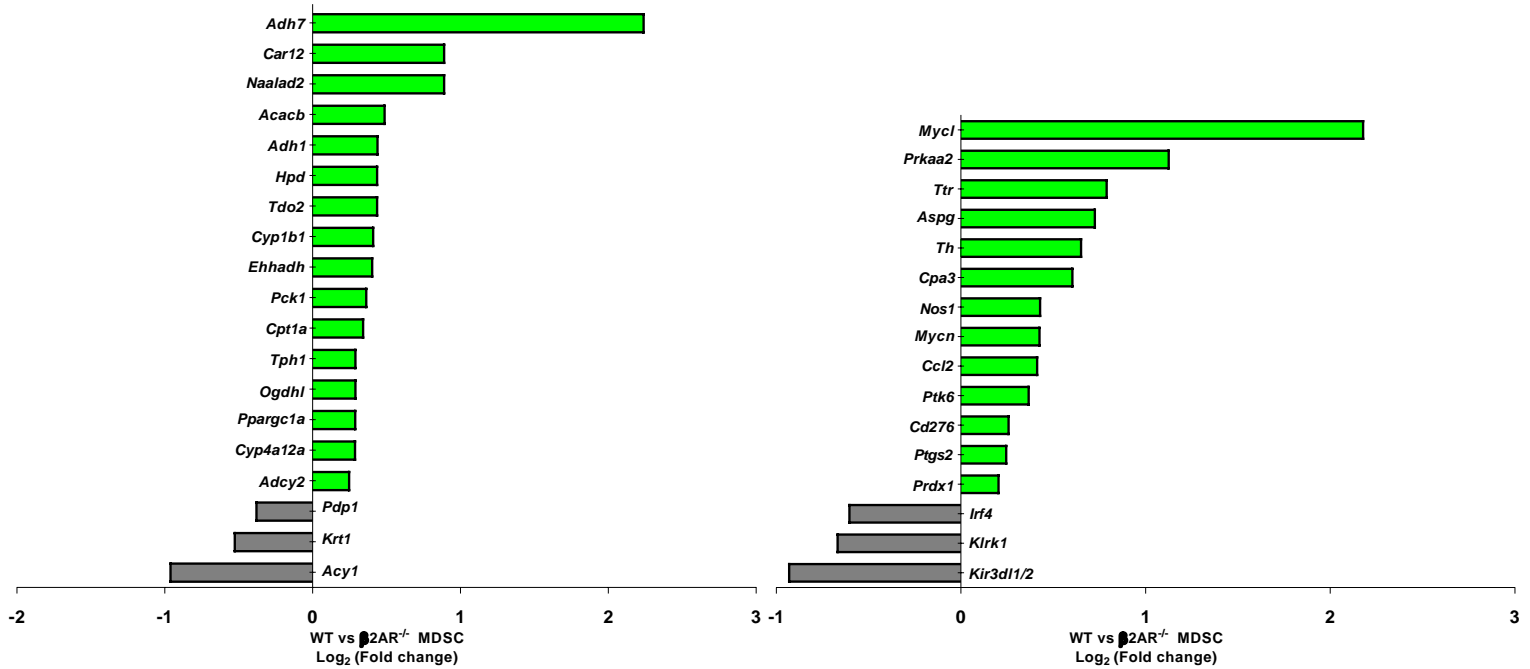

| Pathway                         | P-value  | Adjusted p-value | Odds Ratio | Combined score |
|---------------------------------|----------|------------------|------------|----------------|
| Tryptophan metabolism           | 1.21E-12 | 3.65E-10         | 56.5       | 1550.55        |
| PPAR signaling pathway          | 5.15E-06 | 0.00052          | 19.94      | 242.82         |
| Tyrosine metabolism             | 0.000223 | 0.005629         | 25.42      | 213.78         |
| AMPK signaling pathway          | 1.9E-06  | 0.000288         | 16.14      | 212.64         |
| Adipocytokine signaling pathway | 5.73E-05 | 0.002169         | 19.1       | 186.54         |
| Citrate cycle (TCA cycle)       | 0.004009 | 0.03918          | 21.19      | 116.93         |
| Fatty acid degradation          | 0.00957  | 0.07249          | 13.56      | 63.04          |
| Nitrogen metabolism             | 0.049    | 0.1954           | 19.94      | 60.14          |
| Arachidonic acid metabolism     | 0.02843  | 0.1539           | 7.62       | 27.12          |

**Supplementary Figure 2: β<sub>2</sub>-AR signaling increases the expression of genes correlated with oxidative phosphorylation and fatty acid oxidation.** (A) WT and β<sub>2</sub>-AR<sup>-/-</sup> were orthotopically implanted with 4T1 tumor cells. At day 25, WT or β<sub>2</sub>-AR<sup>-/-</sup> PMN- MDSCs were sorted by flow cytometry from 4T1 tumors of WT or β<sub>2</sub>-AR<sup>-/-</sup> mice (WT or β<sub>2</sub>-AR<sup>-/-</sup> MDSCs were pooled from 5 mice per each group) and Nanostring nCounter microarray analysis of WT or β<sub>2</sub>-AR<sup>-/-</sup> PMN- MDSCs were performed. (B) The main metabolic pathways related to different genes were evaluated using Enricher website. Related to Figures 2, 3, and 5.

# Supplemental Figure 3

## Before sort

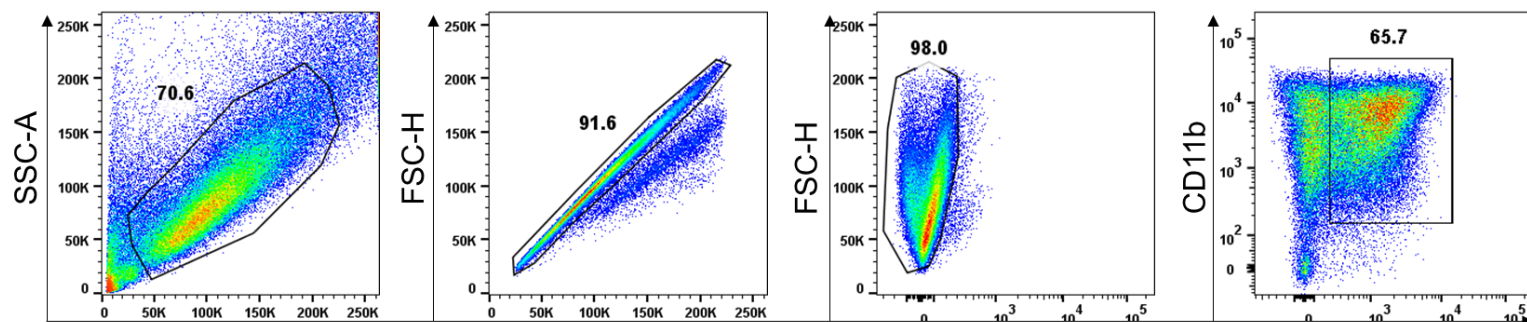

## After sort

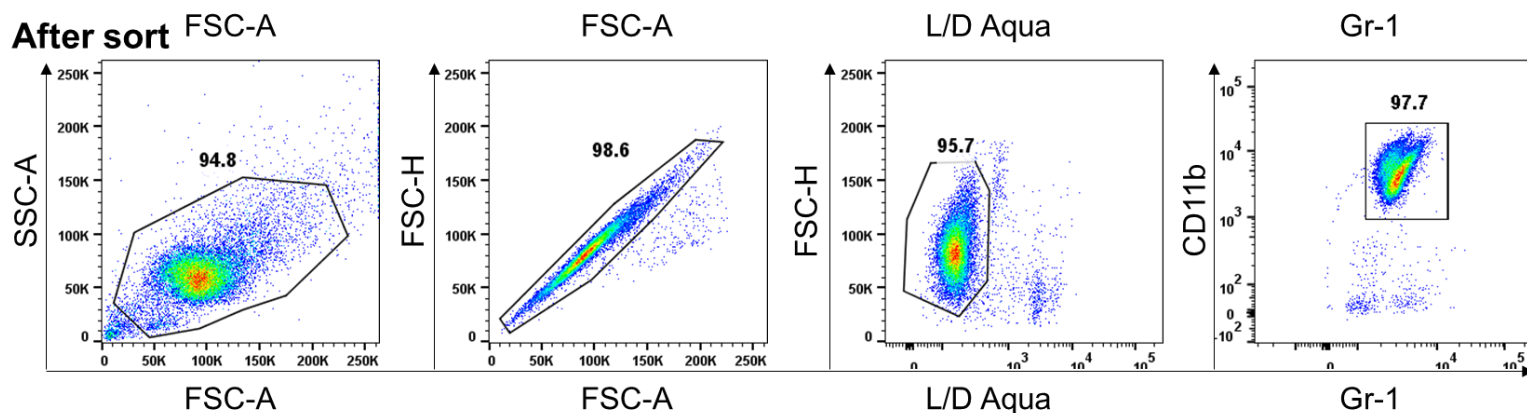

**Supplementary Figure 3:** Flowcytometric analysis of bone marrow derived MDSCs *in vitro*. Bone marrow cells were cultured with GM-CSF and IL-6 in presence or absence of isoproterenol for 6 days and MDSCs phenotype were analyzed by flowcytometry. Related to Figure 2.

## Supplemental Figure 4

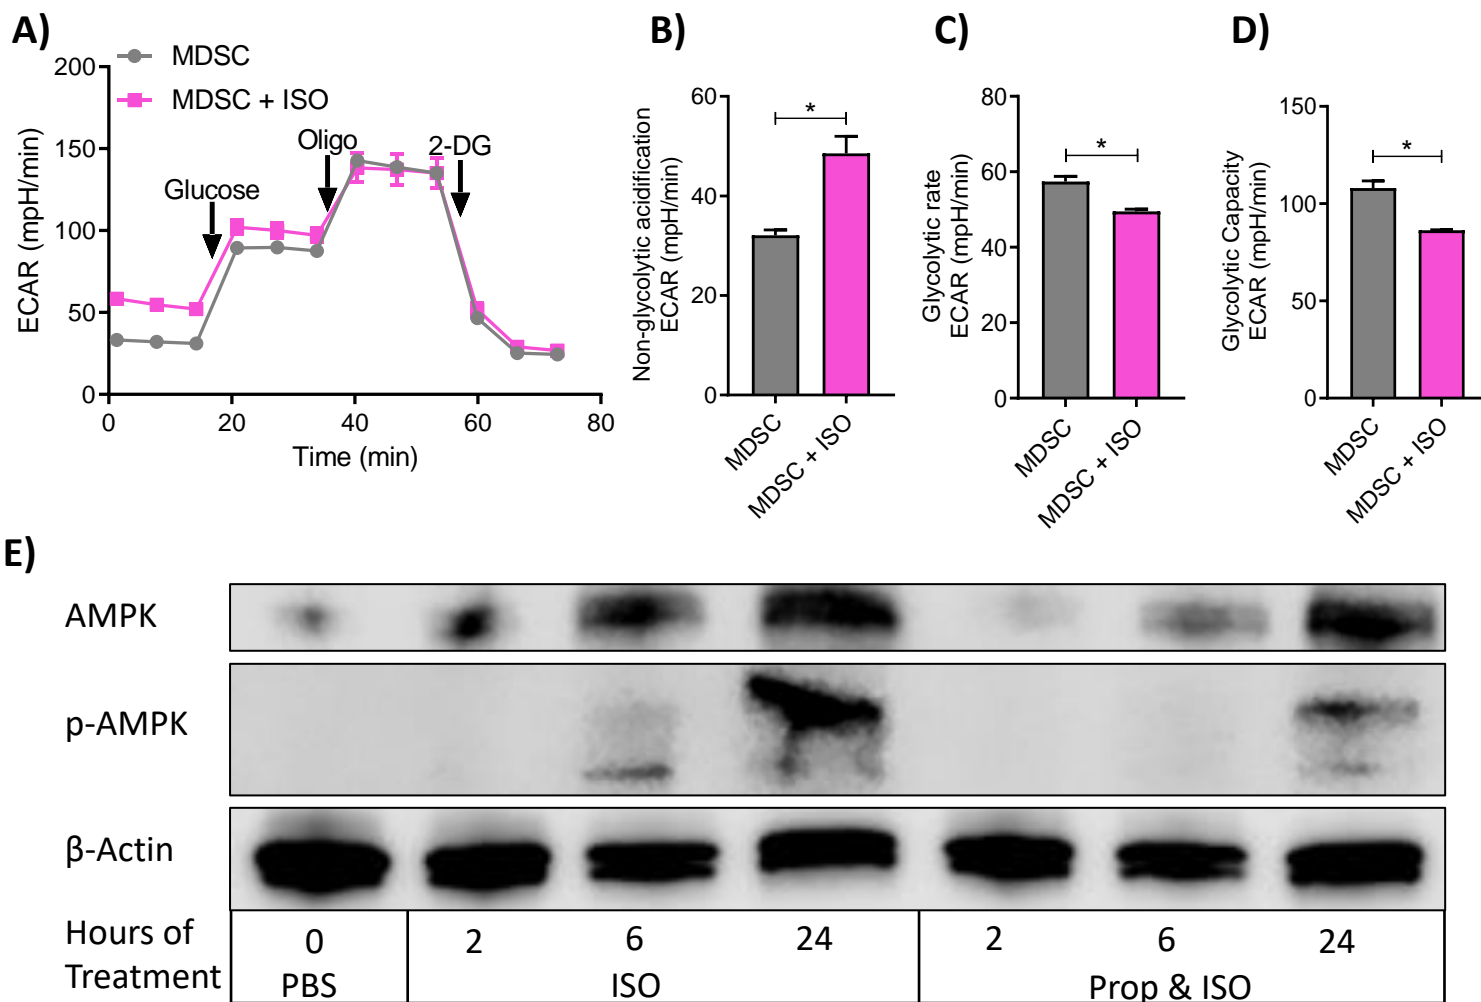

**Supplementary Figure 4)  $\beta$ -AR signaling in MDSCs decreases glycolysis, activates AMPK signaling.** (A-D) MDSCs were derived from bone marrow in the presence of GM-CSF and IL-6, with or without isoproterenol (ISO). A-D) MDSC Glycolysis was measured using a Seahorse Extracellular Flux Analyzer (Arrows indicate when reagents were added: (1) glucose; (2) oligomycin; and (3) 2-DG. B) Non-glycolytic acidification rate. C) Glycolytic rate. D) Glycolytic capacity. E) PMN-MDSCs were sorted from bone marrow of 4T1 tumor bearing mice and treated with PBS, ISO or propranolol plus ISO. Levels of AMPK and phospho-AMPK were measured by western blot. These data are presented as mean  $\pm$  SD from three biological replicates in all graphs, and the students T test was used to analyze statistical significance between two groups. In all panels \*  $P < 0.05$ . A P value less than 0.05 was considered significant. Related to Figure 2.

## Supplemental Figure 5

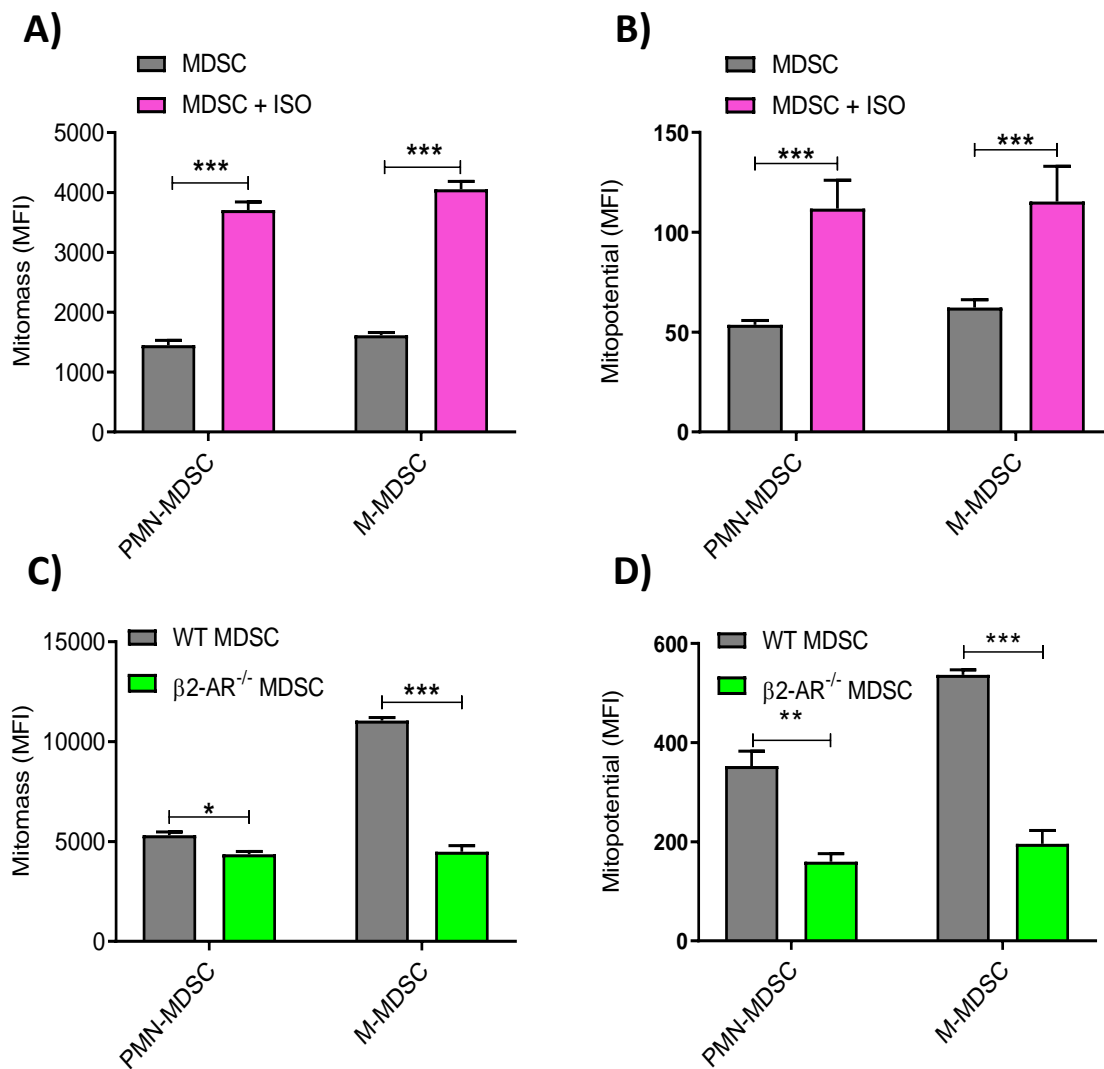

### Supplementary Figure 5: $\beta 2\text{-AR}$ signaling increases mitochondrial mass and mitochondrial potential in PMN-MDSCs.

(A) MDSCs were derived from bone marrow in presence of GM-CSF and IL-6 with or without ISO and mitochondrial mass (Mitomass) and mitochondrial potential (Mitopotential) were measured using flowcytometry. WT and  $\beta 2\text{-AR}^{-/-}$  were orthotopically implanted with 4T1 tumor cells. At day 25, the level of Mitomass and Mitopotential were evaluated in MDSCs using flowcytometry (gated on live CD45+, CD11b+ and Ly6G+ for PMN-MDSC or Ly6C+ for M-MDSCs). The data are presented as mean  $\pm$  SD from three biological replicates in all graphs and the students T test was used to analyze statistical significance between two groups. In all panels \*  $P < 0.05$ , \*\*  $P < 0.01$  and \*\*\*  $P < 0.001$ . A P value less than 0.05 was considered significant. Related to Figure 2.

## Supplemental Table 1

| Subject     | Buffy Coat Straws | Age at Collection | Race  | Morphology                        | Stage Group Path | Stage Group Clin | Collection Year | ER       |
|-------------|-------------------|-------------------|-------|-----------------------------------|------------------|------------------|-----------------|----------|
| PT-00301521 | 8                 | 49                | White | Infiltrating duct carcinoma, NOS  | 99               | 3B               | 2014            | Negative |
| PT-00189487 | 7                 | 62                | White | Infiltrating duct carcinoma, NOS  | 3A               | 3A               | 2007            | Negative |
| PT-00080162 | 7                 | 64                | White | Infiltrating duct carcinoma, NOS  | 3C               | 2A               | 2009            | Negative |
| PT-00389106 | 8                 | 78                | White | Infiltrating duct carcinoma, NOS  | NA               | 3B               | 2018            | Negative |
| PT-00195101 | 4                 | 83                | White | Infiltrating duct carcinoma, NOS  | 3C               | 3A               | 2007            | Negative |
| PT-00248044 | 7                 | 49                | White | Non-Patient - Family Member       |                  |                  | 2009            |          |
| PT-00248210 | 7                 | 63                | White | Non-Patient - Family Member       |                  |                  | 2009            |          |
| PT-00249151 | 7                 | 60                | White | Non-Patient - Family Member       |                  |                  | 2009            |          |
| PT-00249263 | 5                 | 78                | White | Non-Patient - Community Volunteer |                  |                  | 2010            |          |
| PT-00251287 | 8                 | 83                | White | Non-Patient - Community Volunteer |                  |                  | 2012            |          |

**Supplemental Table 1:** Healthy individuals and patient characteristics. Related to Figure 1.
